# Supplementary material for: Microbial methane formation in deep aquifers associated with the sediment burial history at a coastal site
Source: Copernicus journal article supplement (doi:10.5194/bg-20-5199-2023), 2023-12-21
Supplement: Supplementary file 1 [file bg-20-5199-2023-supplement.pdf]

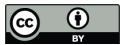

*Supplement of*

## **Microbial methane formation in deep aquifers associated with the sediment burial history at a coastal site**

**Taiki Katayama et al.**

*Correspondence to:* Taiki Katayama (katayama.t@aist.go.jp) and Susumu Sakata (su-sakata@aist.go.jp)

The copyright of individual parts of the supplement might differ from the article licence.

## Supplementary Figures

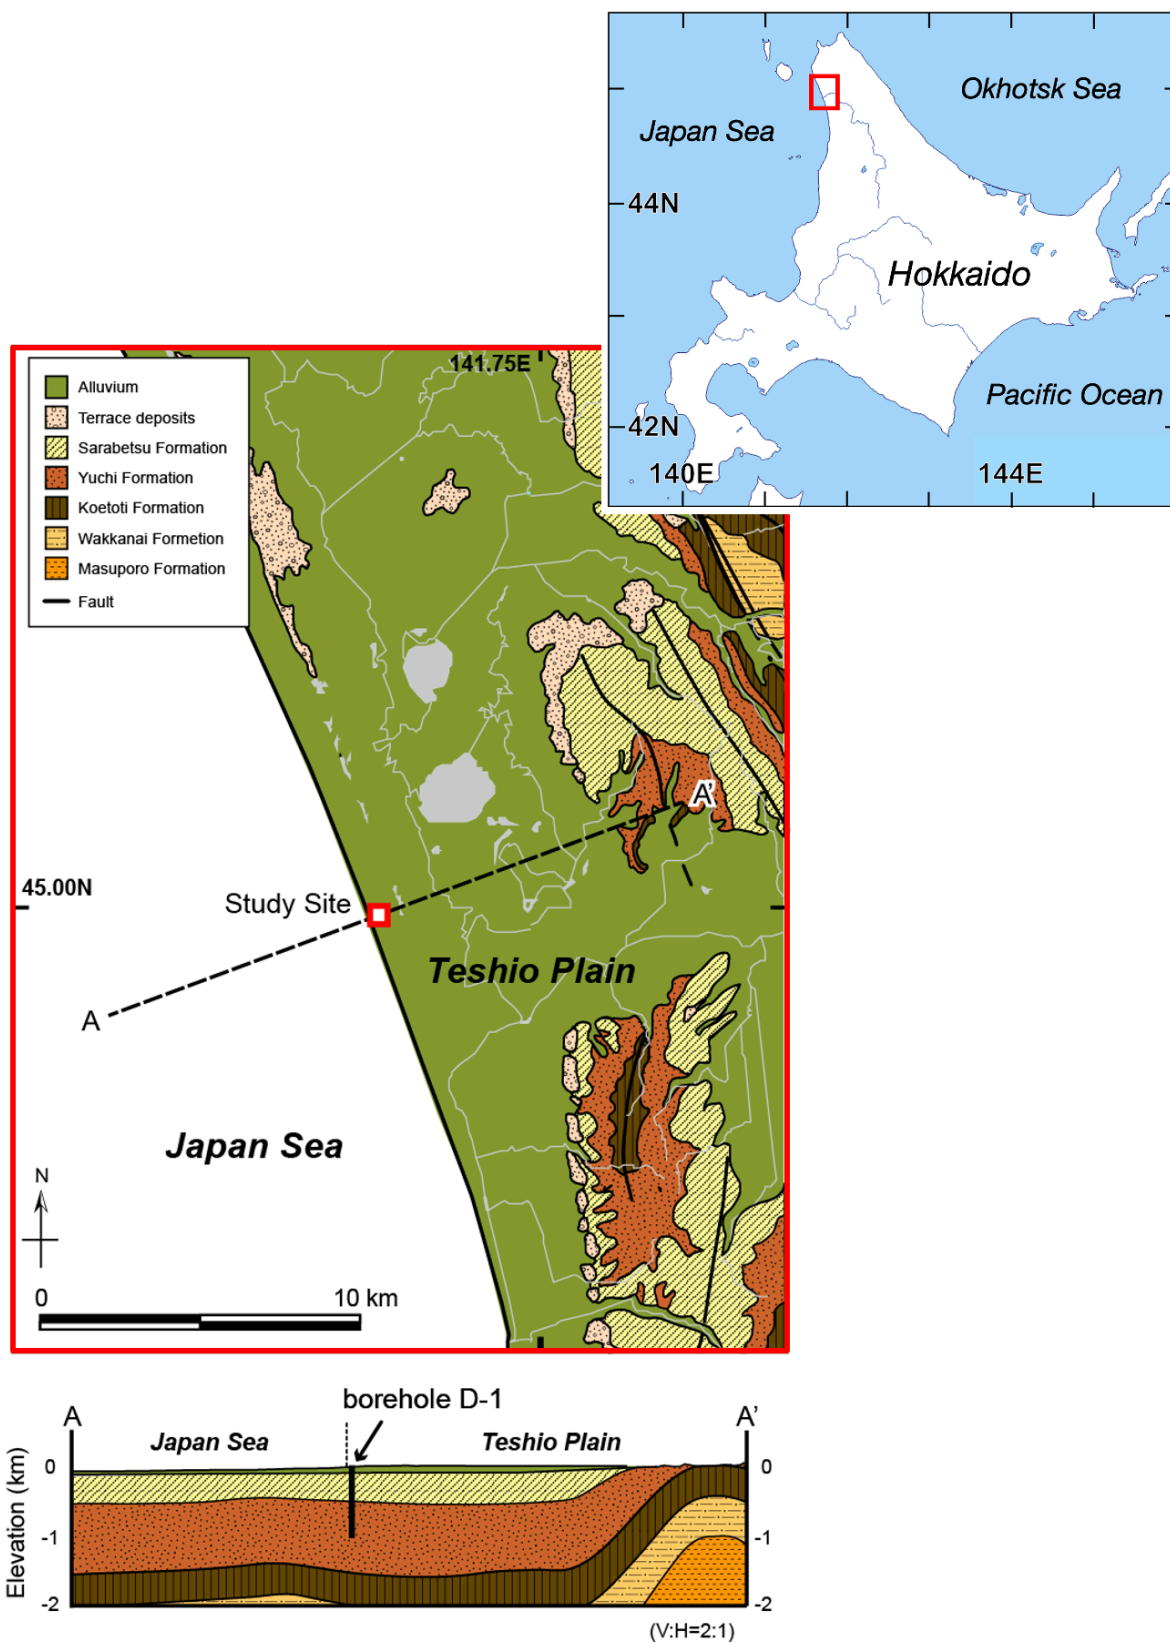

**Fig. S1.** Geological map of the study site (from Ikawa et al., 2014). The ratio of the vertical to horizontal scale of the cross section (A to A') is 2:1.

**a**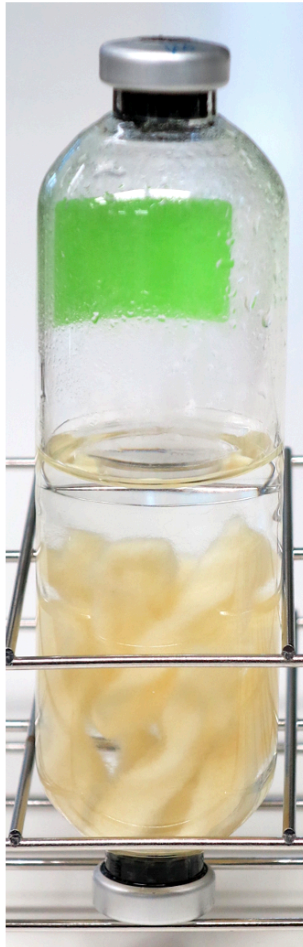**b**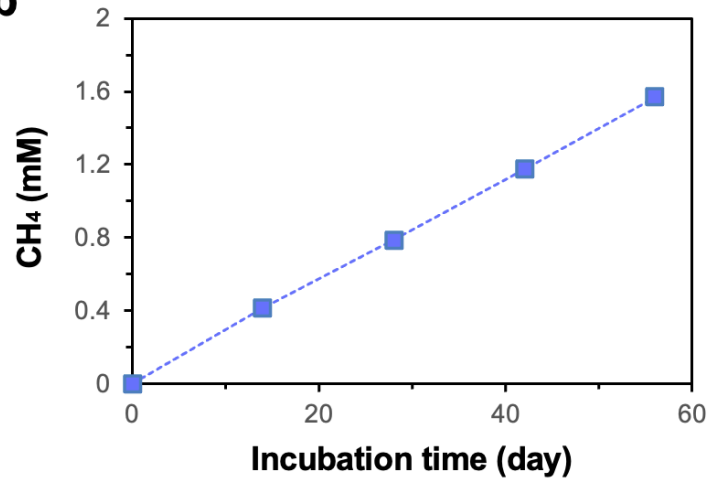**c**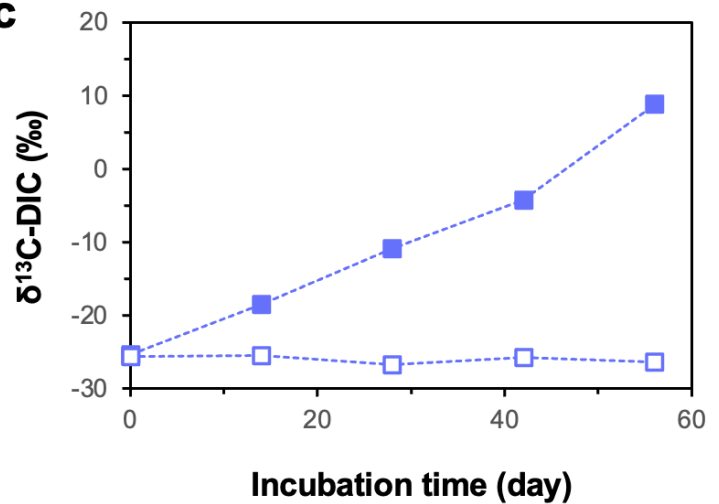

**Fig. S2.** Culture experiments for microorganisms involved in syntrophic acetate oxidation coupled with hydrogenotrophic methanogenesis. **(a)** Photograph of the semi-continuous cultivation system used in this study. **(b)** Time course of CH<sub>4</sub> production and **(c)** the change in  $\delta^{13}\text{C-DIC}$  in the cultures with [2-<sup>13</sup>C]-acetate (closed square) or non-labeled acetate (open square).

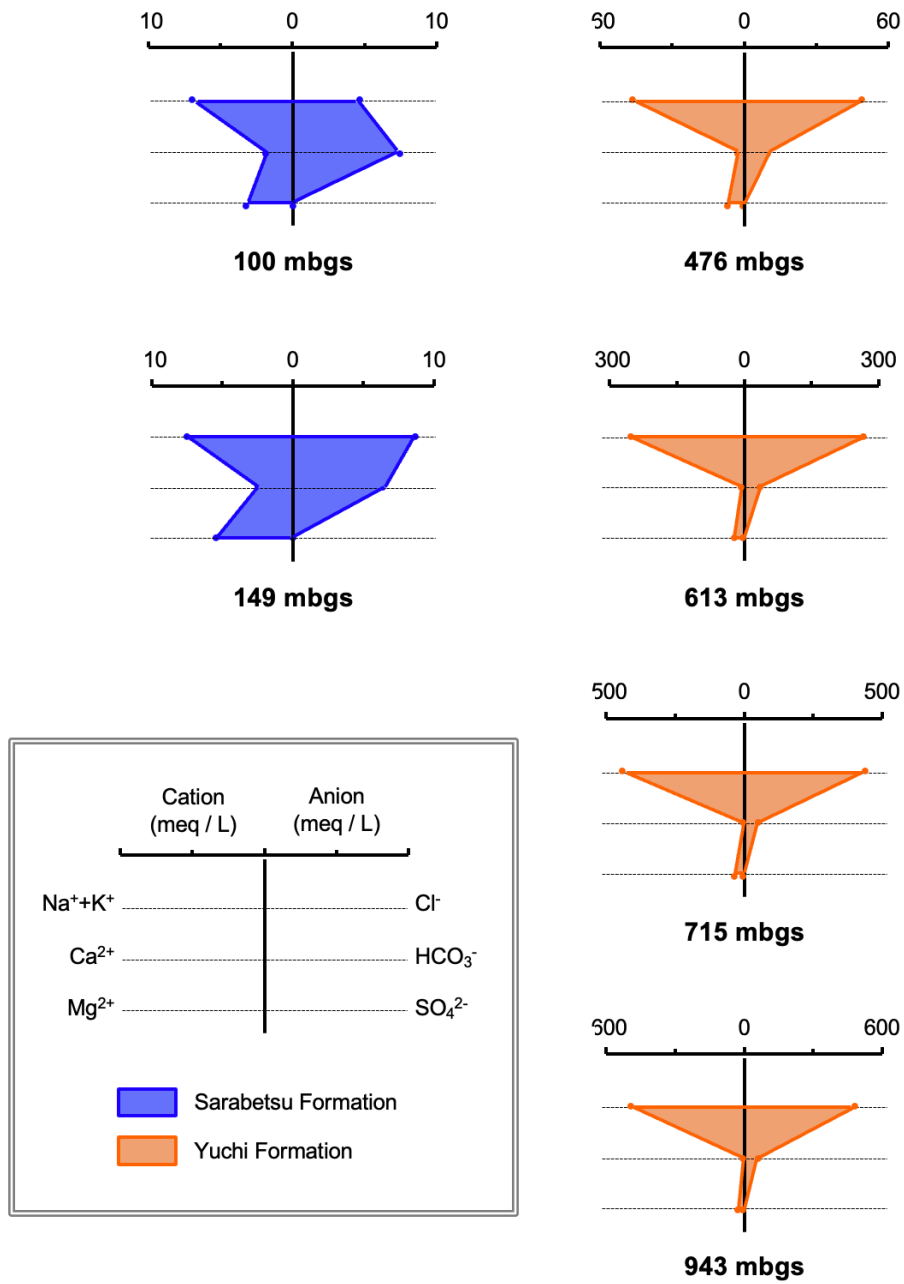

**Fig. S3.** Stiff diagrams showing the ionic strength of the major cation and anion concentrations in the collected water samples (Table 1).

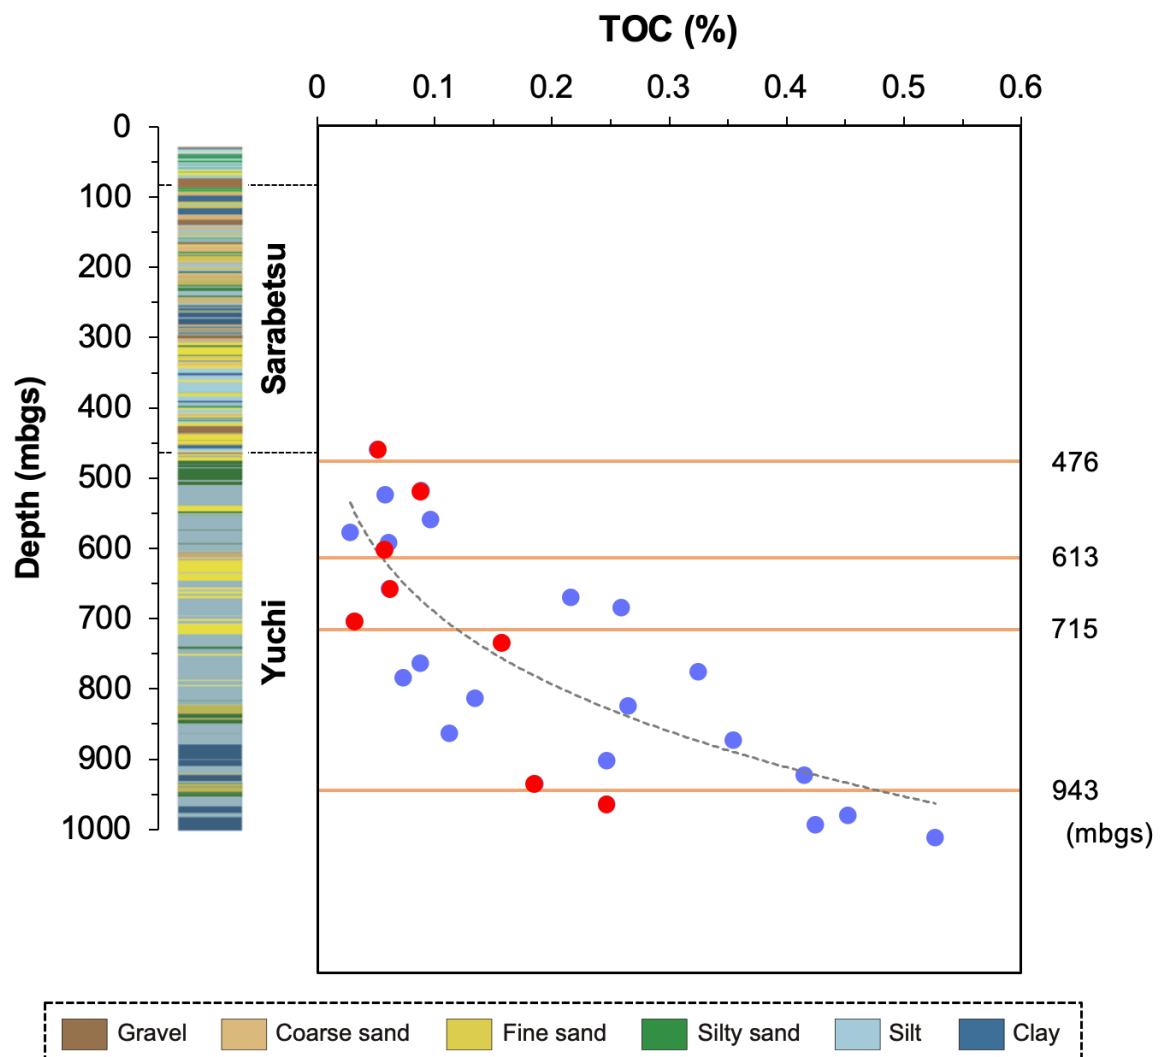

**Fig. S4.** Depth profiles of borehole D-1 showing the lithologies and TOC contents (blue circles) of the Yuchi sediment core samples (silt and clay). Horizontal orange lines indicate the depths of the sampled aquifers. The TOC contents in mud sediments adjacent to the sampled aquifers are indicated by red circles. The dashed line denotes the trend line fitted to the data points.

## Supplementary Table

**Table S1.** Primers and probes used in this study.

| Primer/probe | Sequence (5' to 3')              | Target gene          | Procedure     | Reference             |
|--------------|----------------------------------|----------------------|---------------|-----------------------|
| Bac1055YF    | ATGGYTGTCGTCAGCT                 | bacterial 16S rRNA   | real-time PCR | Ritalahti et al. 2006 |
| Bac1392R     | ACGGGCGGTGTGTAC                  | bacterial 16S rRNA   | real-time PCR | Ritalahti et al. 2006 |
| Bac1115Probe | CAACGAGCGCAACCC                  | bacterial 16S rRNA   | real-time PCR | Ritalahti et al. 2006 |
| Arc787F      | ATTAGATACCCSBGTAGTCC             | archaeal 16S rRNA    | real-time PCR | Yu et al. 2005        |
| Arc1059R     | GCCATGCACCCWCCTCT                | archaeal 16S rRNA    | real-time PCR | Yu et al. 2005        |
| Arc915Probe  | AGGAATTGGCGGGGAGCAC              | archaeal 16S rRNA    | real-time PCR | Yu et al. 2005        |
| ME1F         | GCMATGCARATHGGWATGTC             | <i>mcrA</i>          | real-time PCR | Hales et al. 1996     |
| ME2F         | TCATKGCRTAGTTDGGRTAGT            | <i>mcrA</i>          | real-time PCR | Hales et al. 1996     |
| Univ515F     | GTGYCAGCMGCCGCGGTA               | prokaryotic 16S rRNA | amplification | Ellis et al. 2013     |
| Univ926R     | CCGYCAATTCMTTTRAGTT              | prokaryotic 16S rRNA | amplification | Ellis et al. 2013     |
| MLf          | GGTGGTGTMGGATTCACACARTAYGCWACAGC | <i>mcrA</i>          | amplification | Luton et al. 2002     |
| MLr          | TTCATTGCRTAGTTWGGRTAGTT          | <i>mcrA</i>          | amplification | Luton et al. 2002     |

## References

- Ellis, R. J., Bruce, K. D., Jenkins, C., Stothard, J. R., Ajarova, L., Mugisha, L., and Viney, M. E.: Comparison of the distal gut microbiota from people and animals in Africa, *PloS one*, 8, e54783, 10.1371/journal.pone.0054783, 2013.
- Hales, B. A., Edwards, C., Ritchie, D. A., Hall, G., Pickup, R. W., and Saunders, J. R.: Isolation and identification of methanogen-specific DNA from blanket bog peat by PCR amplification and sequence analysis, *Appl. Environ. Microbiol.*, 62, 668-675, doi: 10.1128/aem.62.2.668-675.1996, 1996.
- Luton, P. E., Wayne, J. M., Sharp, R. J., and Riley, P. W.: The *mcrA* gene as an alternative to 16S rRNA in the phylogenetic analysis of methanogen populations in landfill, *Microbiology*, 148, 3521-3530, doi: 10.1099/00221287-148-11-3521, 2002.
- Ritalahti, K. M., Amos, B. K., Sung, Y., Wu, Q., Koenigsberg, S. S., and Löffler, F. E.: Quantitative PCR targeting 16S rRNA and reductive dehalogenase genes simultaneously monitors multiple *Dehalococcoides* strains, *Appl. Environ. Microbiol.*, 72, 2765-2774, doi: 10.1128/AEM.72.4.2765-2774.2006, 2006.
- Yu, Y., Lee, C., Kim, J., and Hwang, S.: Group-specific primer and probe sets to detect methanogenic communities using quantitative real-time polymerase chain reaction, *Biotechnol. Bioeng.*, 89, 670-679, doi: 10.1002/bit.20347, 2005.
